# NEW TITLES from AMERICAN PSYCHIATRIC ASSOCIATION PUBLISHING

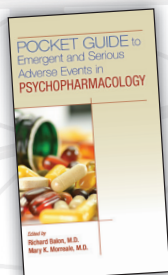

## Pocket Guide to Emergent and Serious Adverse Events in Psychopharmacology

Edited by Richard Balon, M.D., and Mary K. Morreale, M.D.

This book summarizes current knowledge of adverse events from acute dystonia and cardiac emergencies to hepatotoxicity and ocular side effects. Readers will come away with a better understanding of the recognition and detection of adverse events in psychopharmacology, culprit medications, assessment, management, and follow-up treatment.

2023 • 236 pages • ISBN 978-1-61537-453-3 • Paperback • \$61.00 • Item #37453  
2023 • 236 pages • ISBN 978-1-61537-454-0 • eBook • \$48.95 • Item #37454

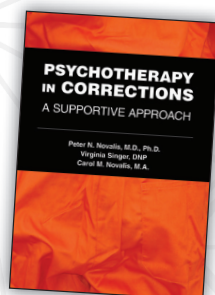

## Psychotherapy in Corrections A Supportive Approach

Peter N. Novalis, M.D., Ph.D., Virginia Singer, DNP, and Carol M. Novalis, M.A.

To practice psychotherapy in a correctional setting is to encounter a range of cultural issues reflecting the various ethnic, class, gender, and physical subgroups of the prison population—as well as to navigate the culture of the prison, staff, and justice system that underpins the patients' circumstances. This book offers mental health professionals a comprehensive look at the most common situations they are likely to face and provides practical advice on dealing with them.

2023 • 536 pages • ISBN 978-1-61537-332-1 • Paperback • \$89.00 • Item #37332  
2023 • 536 pages • ISBN 978-1-61537-432-8 • eBook • \$71.00 • Item #37432

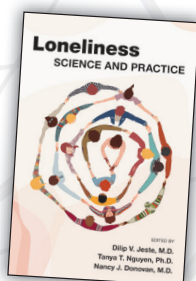

## Loneliness Science and Practice

Edited by Dilip V. Jeste, M.D., Tanya T. Nguyen, Ph.D., and Nancy J. Donovan, M.D.

Offering a comprehensive review of the current literature, this book aims to construct a translational framework for recognizing and addressing loneliness in the clinical context. With clinical vignettes that help ground the information in real-world applicability, this guide presents the theoretical foundations of loneliness; discusses the epidemiology of loneliness throughout the life cycle; examines loneliness in specific populations; analyzes the psychosocial and biological mechanisms of loneliness; and describes research- and community-based interventions.

2023 • 264 pages • ISBN 978-1-61537-422-9 • Paperback • \$53.00 • Item #37422  
2023 • 264 pages • ISBN 978-1-61537-423-6 • eBook • \$42.50 • Item #37423

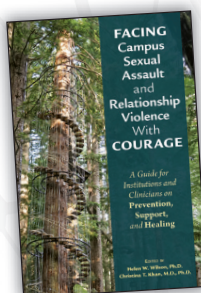

## Facing Campus Sexual Assault and Relationship Violence With Courage A Guide for Institutions and Clinicians on Prevention, Support, and Healing

Edited by Helen W. Wilson, Ph.D., and Christina T. Khan M.D., Ph.D.

This new volume leverages the wisdom of psychiatry, college mental health, and higher education to develop a holistic approach to addressing sexual and relationship violence on campuses. Chapters weave the latest science with real-world knowledge and practical applications that address prevention strategies from early childhood through the collegiate and graduate level; systems of

response and care; clinical interventions for both victims and perpetrators; and support for students from marginalized communities

2023 • 255 pages • ISBN 978-1-61537-443-4 • Paperback • \$54.00 • Item #37443  
2023 • 255 pages • ISBN 978-1-61537-444-1 • eBook • \$43.00 • Item #37444

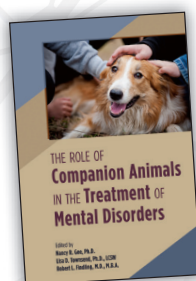

## The Role of Companion Animals in the Treatment of Mental Disorders

Edited by Nancy R. Gee, Ph.D., Lisa Townsend, LCSW-C, Ph.D., and Robert L. Findling, M.D., M.B.A.

Offering a scientifically grounded review of the latest research complemented by practical examples, this book examines the existing evidence to support these practices as well as the risks associated with various types of programs. This robust volume features detailed discussion of topics that include human-animal interactions in specific patient populations and settings, as well as best practices

for ensuring animal welfare and well-being with an emphasis on understanding applicable laws and regulations. Readers will come away with an understanding of the role that animals can play in mitigating psychiatric symptoms, engaging patients in treatment, and enhancing well-being—as well as key principles and considerations for determining whether an animal-based intervention is appropriate for a given patient.

2023 • 314 pages • ISBN 978-1-61537-455-7 • Paperback • \$55.00 • Item #37455  
2023 • 314 pages • ISBN 978-1-61537-456-4 • eBook • \$44.00 • Item #37456

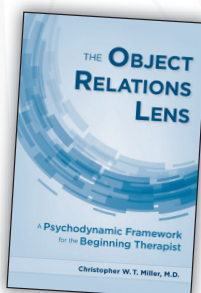

## The Object Relations Lens A Psychodynamic Framework for the Beginning Therapist

Christopher W.T. Miller, M.D.

With a mix of theory, practical advice, and illustrative clinical material, this is a compelling and indispensable resource for any clinician interested in applying the object relations model to their clinical or academic work. As accessible to trainees as it is to experienced clinicians, Dr. Christopher Miller clearly outlines object relations theory, leveraging clinical vignettes to underline the framework's applicability both in therapy and acute care settings.

2023 • 252 pages • ISBN 978-1-61537-428-1 • Paperback • \$52.00 • Item #37428  
2023 • 252 pages • ISBN 978-1-61537-429-8 • eBook • \$42.00 • Item #37429

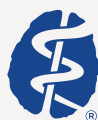

# See and Hear What the Field Is Discussing!

*Psychiatric Services* features research related to the delivery of mental health services, especially for people with serious mental illness in community-based treatment programs. Provision of high-quality care involves collaboration among a variety of professionals. Clinicians, administrators, and policy makers look to *Psychiatric Services* for research on how to deliver evidence-based treatments, to take an integrated “whole-health” approach to care, and to better engage individuals in their care. Mental health’s current focus on patient-centered, recovery-oriented care and on dissemination of evidence-based practices is transforming service delivery systems at all levels. Research published in *Psychiatric Services* contributes to this transformation.

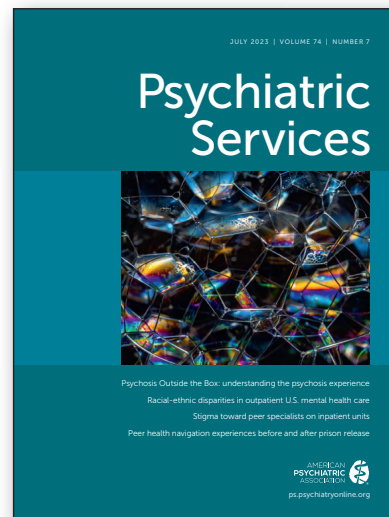

## Our Most Talked About Articles in 2023:

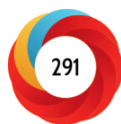

### Established Outpatient Care and Follow-Up After Acute Psychiatric Service Use Among Youths and Young Adults

January issue

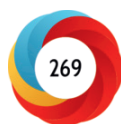

### Mental Health Emergency Hotlines in the United States: A Scoping Review (2012-2021)

May issue

## The Discussion Continues: *Psychiatric Services*' Podcast “From Pages to Practice”

Editor Lisa Dixon, M.D., M.P.H., and Podcast Editor and co-host Josh Berezin, M.D., M.S., discuss the latest mental health services research published in *Psychiatric Services* and why it is relevant. Topics include community-based treatment programs, collaborative care, evidence-based treatment and service delivery, criminal and social justice, policy analysis, and more.

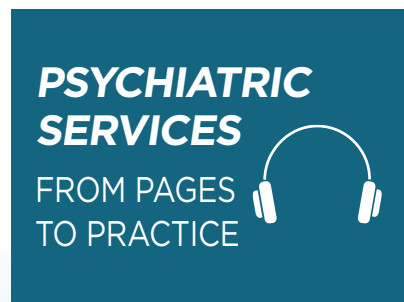

### Guidance for Handling the Increasing Prevalence of Drugs Adulterated or Laced With Fentanyl

Joseph Parks, M.D., discusses guidelines for clinicians in how to deal with the increased prevalence of drugs adulterated with fentanyl and similar potent fentanyl analogs.

### Psychiatrist and Nonpsychiatrist Physician Network Breadth in Dual Eligible Special Needs Plans

Eric P. Slade, Ph.D., discusses the complex and often confusing world of dual eligibility for Medicare and Medicaid coverage when it comes to mental health services, in particular Dual Eligible Special Needs Plans (D-SNPs), a type of Medicare Advantage plan designed around those eligible for both programs.

# Seeking Value

## Balancing Cost and Quality in Psychiatric Care

Edited by Wesley E. Sowers, M.D., and Jules M. Ranz, M.D.

Group for the Advancement of Psychiatry

Health indicators in the United States are among the worst in the developed world, even though its health care system is, by a wide margin, the most expensive in the world. It is a disparity that stems from a fragmentation of services and financial arrangements that often prioritize commercial interests over public health.

*Seeking Value: Balancing Cost and Quality in Psychiatric Care*, a comprehensive volume by the Group for the Advancement of Psychiatry's Mental Health Services Committee, examines the myriad factors that have led to the current state of health care in the United States—starting with an analysis of the meaning and history of value measurement—but it does not stop there. It offers a holistic vision for health care reform, one in which psychiatric professionals play a pivotal role.

A section on system interventions tackles traditional models of financing health care and the role of market forces as it considers broad public health strategies, from elimination of administrative waste to integration of care, that can reduce costs and improve population health, with a special emphasis on the interaction between mental and physical health.

Recognizing that these larger-scale interventions require time to bear fruit, the book also explores the ways the psychiatric profession and individual psychiatrists can contribute to a more skill-diverse, collaborative, activist, value-conscious, and visionary specialty.

Several chapters also identify public policy issues and cultural constructs that go beyond the typical role of clinicians and health care administrators, but that have the potential to impact population health in significant ways, illustrating how different choices could result in remarkable improvements in social well-being. The incorporation of healthy practices in the workplace, efforts to mitigate the impact of climate change, and the elimination of counterproductive incarceration practices all feature in this discussion.

Exhaustive in approach, the book aims to spur thought, conversation, and action to improve value in the services the psychiatric profession provides and the systems in which it operates. Its clear and compelling message will equip readers to develop an advocacy agenda that will resonate with nonmedical stakeholders and the practical strategies needed to see it realized.

# SEEKING VALUE

## Balancing Cost and Quality in PSYCHIATRIC CARE

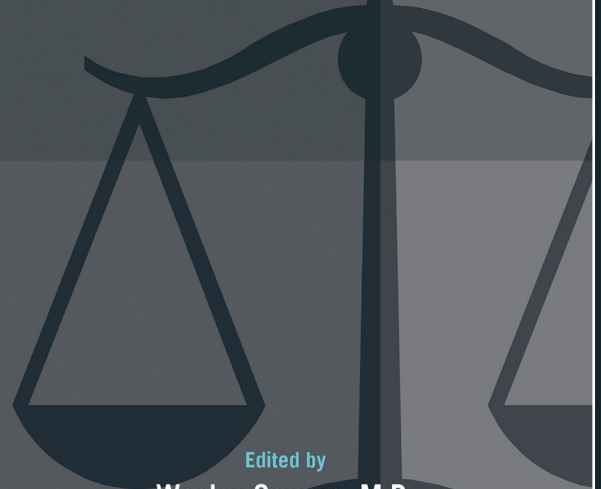

Edited by

Wesley Sowers, M.D.

Jules M. Ranz, M.D.

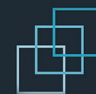

GROUP for the  
ADVANCEMENT of  
PSYCHIATRY

2021 • 643 pages • ISBN 978-0-87318-225-6 • Hardcover • \$85.00 • Item #7225

2021 • 643 pages • ISBN 978-0-87318-226-3 • eBook • \$68.00 • Item #7226

AMERICAN  
PSYCHIATRIC  
ASSOCIATION  
PUBLISHING

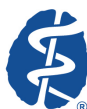

ORDER @ [www.appi.org](http://www.appi.org) | Email: [appi@psych.org](mailto:appi@psych.org) | Toll Free: 1-800-368-5777

20% Discount for American Psychiatric Association Members

25% Discount for APA Resident-Fellow Members

Follow us on  and 





Searching for  
the perfect  
psychiatric  
career?

## Let APA JobCentral help!

### Manage Your Career

- Browse hundreds of active job listings!
- Create an account to save jobs, store multiple resumes and cover letters and communicate with employers through our internal messaging system.
- Set up multiple job alerts specifying your skills, interests and location to receive e-mails when employers post jobs that match your criteria.

### Recruit for Open Positions

- Post your job in front of thousands of highly qualified psychiatrists.
- Cross promote your job listing in Psychiatric News.
- Search the anonymous resume database to find your ideal candidate.

AMERICAN  
**PSYCHIATRIC**  
ASSOCIATION

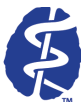

**JOBCENTRAL**  
The Career Hub for Psychiatry

[jobs.psychiatry.org](https://jobs.psychiatry.org)
