# Psychiatric Services

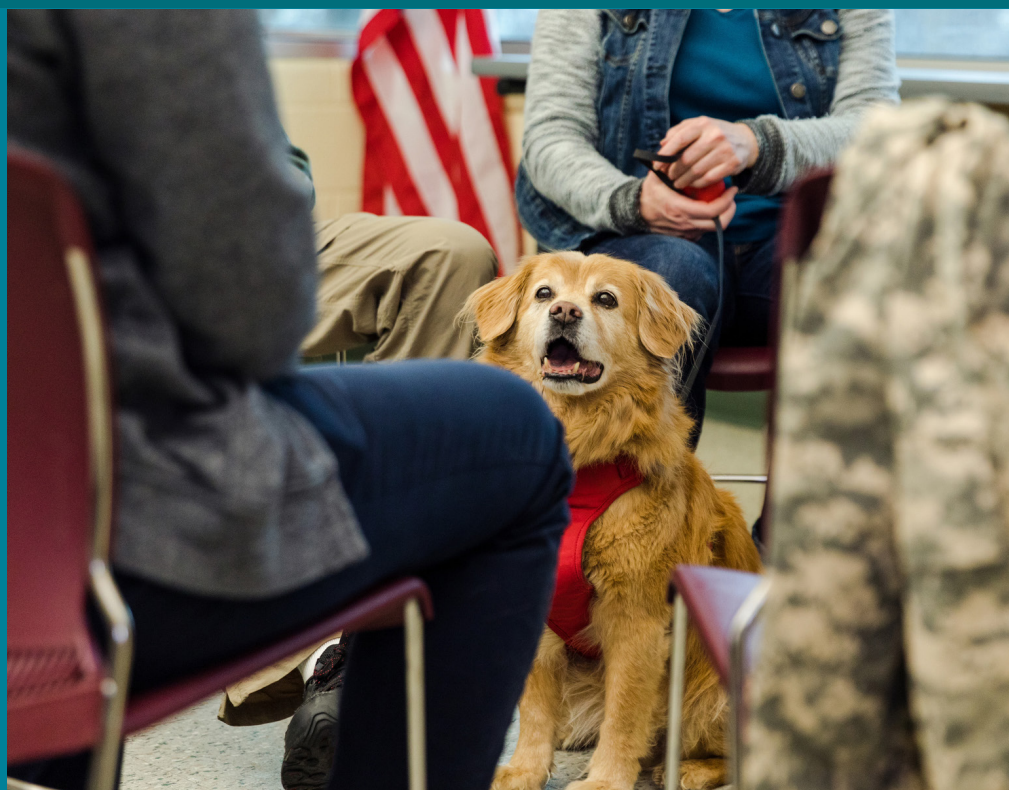

Benefits of service dogs versus emotional support animals for veterans with PTSD

Ethical and practical considerations for use of psychedelics in psychiatry

*DSM-5-TR*: rationale, process, and overview of changes

“He who has hope”: Personal Account from a forensic hospital RN
